# Supplementary material for: Fast-response self-powered flexible transparent ultraviolet photodetectors based on a CuO/ZnO nanowire array heterojunction
Source: Royal Society of Chemistry journal article supplement (doi:10.1039/d2nj06004c), 2023-01-01
Supplement: d2nj06004c1.pdf [file d2nj06004c1.pdf]

# Electronic Supplementary Information

## **Fast-response self-powered flexible transparent ultraviolet photodetectors based on CuO/ZnO nanowire array heterojunction**

Yi Li,<sup>a</sup> Xiaojing Wei,<sup>a</sup> Qiuyue Yang,<sup>a</sup> Jie Zhang,<sup>a</sup> Wencai Wang,<sup>b</sup> Linlin Dong,<sup>a</sup> Bokai Gao,<sup>a</sup>

Chen Li,<sup>a</sup> Xiaolin Sun<sup>a</sup>, and Yanwen Ma<sup>\*a</sup>

<sup>a</sup> Key Laboratory for Organic Electronics and Information Displays & Jiangsu Key Laboratory for Biosensors, Institute of Advanced Materials (IAM), Jiangsu National Synergistic Innovation Center for Advanced Materials (SICAM), Nanjing University of Posts and Telecommunications, 9 Wenyuan Road, Nanjing 210023, China.

<sup>b</sup> Building Materials Academy of Sciences Research, NO.69 North Road Jinding Street of Shijingshan District ,Beijing 100041,China;

E-mail: [iamywma@njupt.edu.cn](mailto:iamywma@njupt.edu.cn)

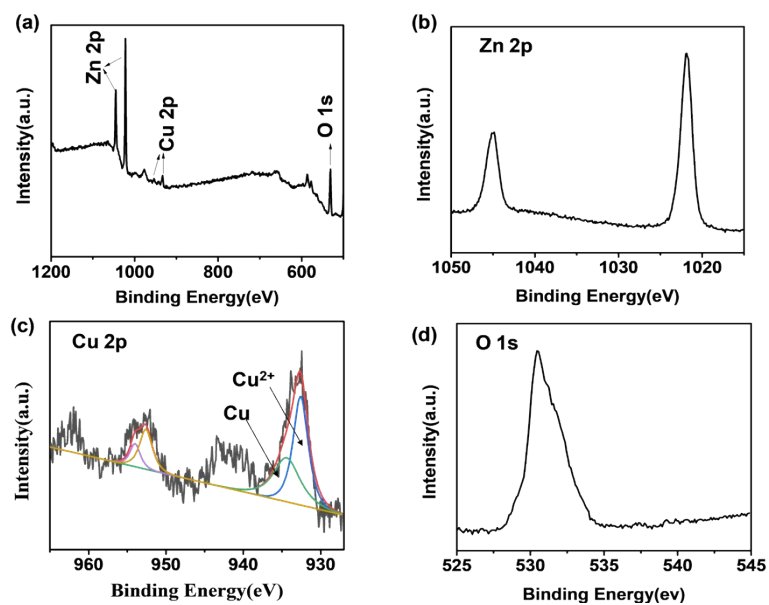

**Figure S1** XPS spectra of (a) survey scan, (b) Zn 2p, (c) Cu 2p, and (d) O 1s of Cu/CuO/ZnO NWs.

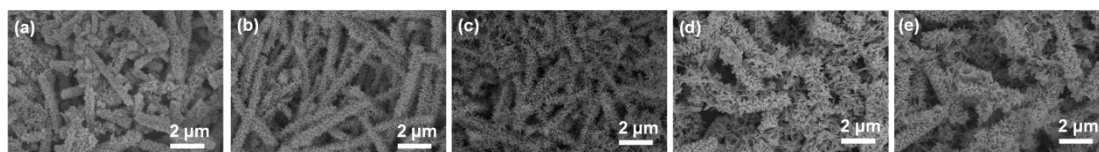

**Figure S2** SEM images of CuO/ZnO NW array heterojunction films with ZnO growth time of (a) 0.5 , (b) 1, (c) 2, (d) 3 and (e) 5 h. All the films were prepared by pray coating CuO/ZnO NW on PET substrates with the thickness of 2500 nm.

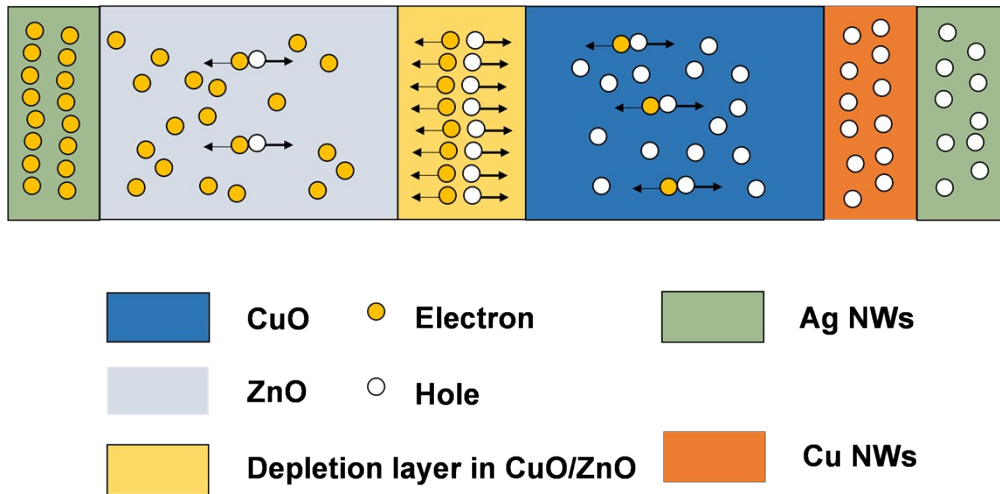

**Figure S3** Schematic illustration of the charge transport process of self-powered flexible transparent UV PDs based on CuO/ZnO NW array heterojunction under UV light.

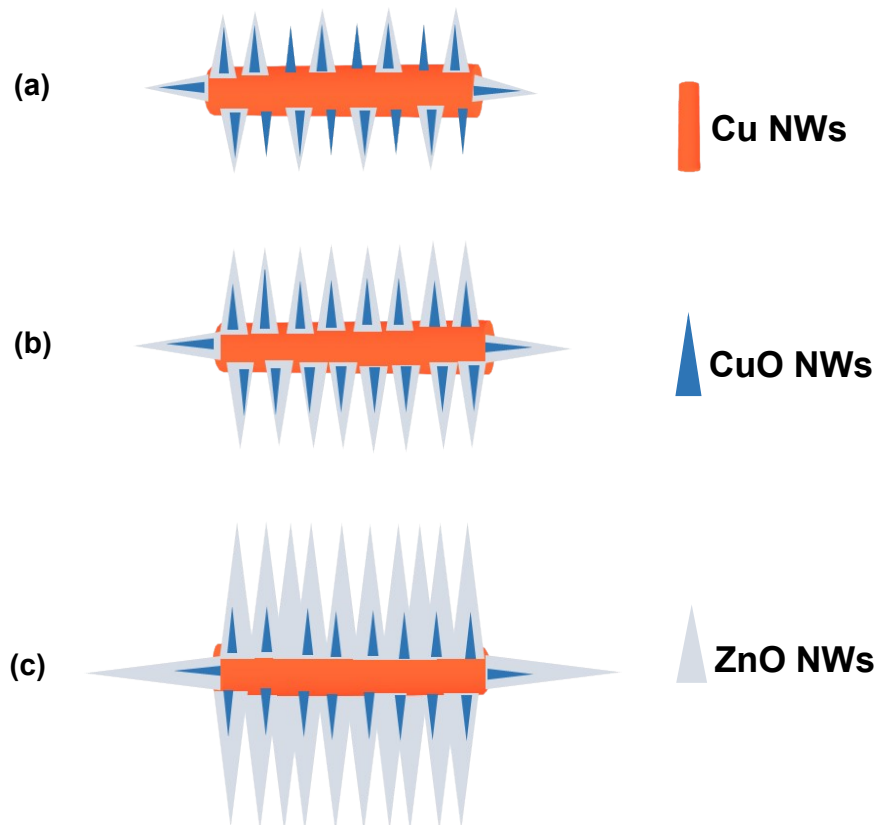

**Figure S4** Schematic illustration of the structure of CuO/ZnO NW array heterojunction on Cu NW substrates with the different ZnO growth time of 1h (a), 3h (b) and 5 h (c).
